# Supplementary material for: Impact of a pharmaceutical care service for patients with rheumatoid arthritis using a customised mobile device (the PROUD trial): study protocol for a randomised controlled trial
Source: HighWire-hosted journal article supplement (doi:10.1136/bmjopen-2022-061917), 2022-06-01
Supplement: bmjopen-2022-061917supp001_data_supplement.pdf [file bmjopen-2022-061917supp001_data_supplement.pdf]

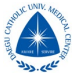

(Version 2.1)

## 대상자 설명문

### 1. 연구과제명

류마티스관절질환자 대상 원격 모바일 약료서비스 성과분석 연구

### 2. 연구책임자

대구가톨릭대학교병원 류마티스내과 교수 김 지 원

### 3. 개요

이 연구는 비대면 서비스에 대한 사회적 요구도가 높은 상황에서, 전문 임상약사의 표준화된 원격 모바일 약사서비스 제공이 류마티스관절염 환자의 약물관리 효과에 미치는 영향을 평가하기 위한 연구입니다. 귀하는 류마티스관절염 치료를 위한 새로운 약물을 투여하기 시작하였기에 이 연구에 참여하도록 권유 받았습니니다. 이 연구를 수행하는 대구가톨릭대학교병원 소속 연구책임자(김지원 교수) 혹은 연구담당자(박지은 약사, 070-8015-6040)가 귀하에게 이 연구 참여 과정에 대하여 설명해 줄 것입니다 이 연구는 자발적으로 참여 의사를 밝히신 분에 한하여 수행될 것이며, 귀하께서는 본 임상 연구에 참여 의사를 결정하기에 앞서, 본 임상연구가 왜 수행되고, 귀하의 정보가 어떻게 사용될지, 본 임상연구가 어떤 것을 포함하고 있는지와 가능한 이점, 위험, 불편함은 무엇인지에 대하여 이해하는 것이 중요합니다. 다음의 설명을 신중하게 시간을 가지고 주의 깊게 읽으시기 바라며, 필요하시면 귀하의 주치의 또는 가족이나 친구들과 상의하시기 바랍니다. 만일 어떠한 질문 사항이 있으시면 연구자가 자세하게 설명해 줄 것입니다.

### 4. 연구의 목적 및 배경

관절 활막의 지속적인 염증 반응을 특징으로 하는 류마티스관절염은 일반적으로 관절 손상을 예방하고 골밀도를 보존하기 위해 장기적 약물치료가 필수적입니다. 약물의 치료효과를 높이고 합병증을 관리하기 위해 의사, 간호사 및 임상약사에 의한 통합적인 보건의료서비스에 대한 요구도가 높아졌습니다. 아울러, 최근 코로나 19 의 대규모 확산 사태와 함께 약물요법 관리를 위한 비대면 약사서비스 제공이 중요하게 고려되고 있습니다.

본 연구에서는 류마티스 관절염 환자에서의 효과적인 약물요법 관리를 위한 전문 임상약사의 표준화된 원격 모바일 약사서비스 제공이 질병 및 약물관리에 미치는 효과를 평가하고자 합니다.

### 5. 연구 약물/기기

본 임상시험은 비대면 약물사용교육 서비스가 중심이 되므로, 이 연구에 참여함으로써 귀하에게 새롭게 투여되는 약물이나 기기는 없습니다. 귀하가 본 임상연구에 참여하는 동안 류마티스관절염을 치료하기 위해 받게 되는 모든 약물요법 및 치료적 처치는 연구참여 여부와 상관없이 의학적 판단에 따라 이루어집니다.

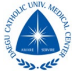

(Version 2.1)

## 6. 대안 치료 (임상시험 이외의 다른 대체 가능한 치료법)

귀하가 본 연구에 참여하기를 원하지 않는다면, 귀하의 연구 담당의사는 귀하에게 적절한 치료법에 대해 설명할 수 있으며 귀하는 모든 표준 요법들로 치료받으실 수 있습니다.

## 7. 연구방법에 관한 설명

### (1) 절차 또는 치료

본 연구에 참여한 대상자는 무작위배정을 거쳐 1:1 의 비율로 원격 모바일 약사서비스군(시험군)과 기존 약사서비스군(대조군)으로 나누어집니다. 두 군 모두 기존의 치료와 처치, 검사를 받게 되며, 시험군의 환자는 추가적으로 본 연구의 계획에 따라 원격 모바일 약사서비스를 제공받게 됩니다. 1 개월 간격으로 유선으로 약사가 귀하에게 전화를 할 것이며, 약사는 복용 중인 약물을 조사하고 복약상담과 복약순응도 향상을 위한 교육을 제공할 것입니다. 평상시에 귀하는 모바일 어플리케이션을 활용하여 환자별로 맞춤형으로 제공된 약물정보를 토대로 약물복용과 관련하여 궁금한 내용을 확인할 수 있으며, 삶의 질과 복약순응도는 설문으로 평가하게 됩니다.

| 방문일정                   | 설문조사                      |
|------------------------|---------------------------|
| 방문 1 (외래 등록 시)         | 삶의 질, 복약순응도, 약물인지도, 환자만족도 |
| 방문 2 (연구시작 3개월 ± 7일 후) | 복약순응도, 약물인지도              |
| 방문 3 (연구시작 6개월 ± 7일 후) | 삶의 질, 복약순응도, 약물인지도, 환자만족도 |

### (2) 연구기간 및 대상자 참여 기간, 예상 대상자 수(전체 대상자 수/본원 대상자 수)

본 임상연구는 대구가톨릭대학교병원 생명윤리위원회의 승인일로부터 2023.12.31.까지 진행됩니다. 본 임상연구에 참여하는 대략의 대상자 수는 256 명으로 각 대상자의 연구참여 예상기간은 무작위배정 이후 최소 6 개월입니다.

### (3) 시험 제한 사항 및 대상자 의무

본 연구에 참여하는 동안 본 기관에서 처방하는 약물 또는 관리 외에 별도의 다른 약물을 사용(복용하거나, 주사로 투여하거나, 피부에 바르는 등)할 경우에는 반드시 연구담당자에게 알려 주십시오. 연구담당자의 지시에 따르지 않거나, 추적관찰에 실패할 경우 귀하는 귀하의 동의 없이도 본 연구의 참여로부터 제한될 수 있습니다.

### (4) 대상자 선정, 제외기준

#### ● 대상자 선정기준

- ① 대구가톨릭대학교병원 류마티스내과를 방문하는 18 세 이상 외래 환자 중 류마티스 관절염으로 진단받고 다음과 같은 DMARD 를 1 개 이상 투여하는 자
  - Conventional DMARDs: Hydroxychloroquine, methotrexate, sulfasalazine, bucillamine, leflunomide
  - 생물학적 DMARDs (피하주사제): etanercept, adalimumab, golimumab
  - JAK 억제제: tofacitinib, baricitinb



(Version 2.1)

- ② 무작위배정 시점에 새로운 약물(DMARD, 스테로이드제, 또는 진통제)를 투여하기 시작한 자
- ③ 모바일 기기(스마트폰 등)를 소지한 자
- ④ 연구 참여에 동의한 자

#### ● 대상자 제외기준

- ① 인지능력 저하 등으로 인해 서면 또는 면접설문 응답이 어려운 환자
- ② 중증의 전신 또는 악성 질환자 (ECOG 2점 이상, 악성 종양을 진단받고 치료 중인 자)
- ③ 모바일 기기에 복약순응도 향상도구(동 연구에서 제작한 별도의 어플리케이션 또는 앱)이 설치되지 않거나 설치에 동의하지 않는 자
- ④ 멀티미디어 메시지 서비스(Multimedia Messaging Service, MMS)를 이용한 복약정보 제공에 동의하지 않는 자
- ⑤ 기타 연구진이 연구 참여에 적절하지 않다고 판단한 자

#### 8. 대상자에게 예견되는 이상반응, 위험과 불편함

본 연구는 비대면 약물사용교육 서비스가 중심이므로 참여하는 대상자에게서 연구 수행 시 진행되는 모든 검사나 교육은 침습적이거나 위험하지 않습니다. 따라서 본 연구 참여로 인해 나타날 것으로 예상되는 추가적인 부작용이나 불편은 없습니다. 단, 본 연구에의 참여로 인해 받게 되는 복약상담 및 교육서비스에 다소간의 시간이 소요될 수 있습니다

#### 9. 대상자에게 예견되는 이득

귀하가 본 연구에 참여함으로써 귀하에게 의학적 혜택이 보장되는 것은 아닙니다. 본 연구에 참여하는 동안 받게 되는 모든 약물요법 및 치료적 처치는 연구참여 여부와 상관없이 동일합니다. 그러나, 전문임상약사에 의해 추가적인 비대면 약물사용교육 서비스를 제공받음으로써 효과적인 약물요법 관리가 가능하고 약물의 효과를 높일 수 있을 것으로 기대됩니다.

#### 10. 연구 관련 새로운 정보의 지속적 제공

본 연구 기간 중 귀하의 시험 참여 여부를 결정하는데 영향을 줄 수 있는 새로운 유의한 정보가 얻게 되는 즉시 귀하 또는 귀하의 대리인에게 알려 드릴 것입니다.

#### 11. 금전적 지급

본 연구 참여 중 실시되는 모든 약물요법 및 검사 과정은 연구에 참여하지 않더라도 받아야 하는 것으로 약제 및 검사비에 대한 보상은 없으며 연구에 참여함으로써 대상자에게 추가적으로 발생하는 별도의 비용은 없습니다. 본 연구의 참여로 인해 소요되는 시간에 대한 보상으로 첫 방문과 연구시작 6개월째 마지막 방문 시 각각 1만원의 교통비가 지급될 예정입니다.



(Version 2.1)

## 12. 피해발생 시 대상자 보상(의료적 치료/보상)

본 연구는 기존 진료에서 진행되고 있는 시술 또는 치료 방법(의약품, 의료기기 포함)에 추가로 약사에 의한 비대면 약물요법관리가 이루어지는 연구로서, 의학적으로 판단하였을 때 동 연구로 인한 추가적 위험이 기존 진료 과정에서 진행되고 있는 시술 또는 치료 방법보다 현저하지 않습니다. 따라서 이 연구로 인해 대상자가 추가적으로 입게 되는 신체적, 정신적 위해 및 특이 손상은 없을 것으로 예측됩니다. 대상자들에게는 통상적인 진료 과정에서 이루어지는 안전 보호 대책이 적용될 것이며, 연구 시작 전 연구대상자들에게 해당 연구의 목적과 방법 등에 대해 충분한 정보가 제공될 것입니다.

## 13. 비밀 보장

연구대상자의 신원을 파악할 수 있는 기록은 비밀로 보장될 것이며, 연구의 결과가 출판될 경우 연구대상자의 신원은 비밀상태로 유지될 것입니다. 연구대상자 번호는 환자의 병원등록번호가 아닌 각 환자마다 임의의 번호를 할당하여 관리할 것이며, 연구를 위해 수집되는 모든 정보와 자료는 잠금장치가 있는 연구책임자가 지정한 곳에 보관할 것입니다. 연구관련 기록은 연구완료시점부터 3 년간 보관하며, 보관기간이 지난 문서나 파일은 개인정보보호법에 따라 파기할 것입니다.

## 14. 의무기록의 열람

임상연구의 책임연구자, 연구담당자, 공동연구자, 생명윤리위원회(IRB)는 관계 법령에 따라 연구의 절차와 자료의 품질을 검증하기 위하여 대상자의 신상에 관한 비밀이 보호되는 범위에서 대상자의 연구기록을 열람할 수 있습니다. 대상자 또는 대상자의 대리인이 서명한 동의서에 의하여 이러한 자료의 열람이 허용될 것입니다.

## 15. 자발적 참여

본 연구에 참여하시는 것은 귀하에게 달려 있습니다. 귀하는 언제든지 시험에 참여하지 않기로 결정할 수 있고 또한 시험을 그만 둘 수 있습니다. 귀하가 본 연구에 참여하지 않아도 아무런 불이익을 받지 않으며 귀하의 결정은 향후 귀하가 진료를 받는 것에 영향을 미치지 않습니다.

## 16. 연구의 중지

연구담당 약사의 지시를 따르지 않거나, 정해진 기간에 유선을 통한 연락이 되지 않아 추적관찰에 실패한 경우, 연구자의 판단 하에 더 이상 연구 참여가 부적합한 경우(예: 인지능력 상실 등)에 귀하는 귀하의 동의 없이 본 연구의 참여가 제한될 수 있습니다.

## 17. 개인정보 제공에 관한 사항

본 동의서에 서명함으로써 귀하는 연구진이 귀하의 개인정보 및 민감정보를 수집하고 사용하는데 동의하게 됩니다.



(Version 2.1)

- **개인 및 민감정보의 수집·이용 목적**

개인정보: 귀하의 이름, 주소, 휴대전화번호, 출생연도, 성별, 이메일주소

민감정보: 류마티스관절염 유병기간 및 약물복용기간, 동반질환, 흡연력, 키, 체중, 혈압, 맥박수, 임상검사정보, 응급실 방문 또는 입원 정보, 설문조사 정보(건강관련 삶의 질, 복약순응도, 약물인지도, 약사서비스만족도 등), 모바일 기기 정보(이동통신사 정보, 단말기 정보), 쿠키, 접속기록, 접속시간

수집·이용 목적: 귀하의 성명, 성별, 나이, 병원등록번호, 임상연구 과정에서 발생하는 진료기록 및 자료 등 건강 관련 정보는 연구 관련 임상 정보의 획득 및 확인을 위한 목적으로만 수집되며 이용됩니다.

- **개인 및 민감정보의 보유 및 이용 기간**

귀하의 개인 및 민감정보는 연구를 위해서만 사용되며 수집된 개인정보는 개인정보 보호법에 따라 적절히 관리됩니다. 수집된 개인정보 및 민감정보는 연구 결과보고 후 3년간 보관 후 폐기합니다.

- **동의를 거부할 권리가 있다는 사실 및 동의 거부에 따른 불이익이 있는 경우에는 그 불이익의 내용**

귀하는 위 개인 및 민감정보 수집 및 이용, 제공에 대한 수락 여부를 자유롭게 결정할 수 있습니다. 귀하가 개인 및 민감정보 수집 및 이용, 제공에 수락하지 않는 경우에도 귀하에 대한 진료와 처방에 어떠한 불이익도 발생하지 않습니다.

#### 18. 연구 관련 책임자 및 연락처

귀하는 연구책임자 혹은 연구담당자(박지은 약사/070-8015-6040)에게 임상연구 기간 중에 언제든지 추가적인 정보를 요청할 수 있습니다. 또한 귀하는 연구 대상자로서의 귀하의 권리에 대해 의문이 있을 경우 대구가톨릭대학교병원 생명윤리위원회(053-650-3062, 3063)로 연락할 수 있습니다.



(Version 2.0)

## 대상자 동의서

### 연구과제명: 류마티스관절질환자 대상 원격 모바일 약료서비스 성과분석 연구

1. 본인은 임상연구에 대해 구두로 설명을 받고 상기 대상자 설명문을 읽었으며 담당연구원과 이에 대하여 의논하였습니다.
2. 본인은 위험과 이득에 관하여 들었으며 나의 질문에 만족할 만한 답변을 얻었습니다.
3. 본인은 이 연구에 참여하는 것에 대하여 자발적으로 동의합니다.
4. 본인은 이후의 치료에 영향을 받지 않고 언제든지 연구의 참여를 거부하거나 연구의 참여를 중도에 철회할 수 있고 이러한 결정이 나에게 어떠한 해가 되지 않을 것이라는 것을 알고 있습니다.
5. 본인은 이 설명서 및 동의서에 서명함으로써 의학 연구 목적으로 나의 개인정보가 현행 법률과 규정이 허용하는 범위 내에서 연구자가 수집하고 처리하는데 동의합니다.
6. 본인은 개인정보 및 민감정보의 수집, 이용에 대한 설명을 이해하고 이에 동의합니다.

|                                        |                                                         |
|----------------------------------------|---------------------------------------------------------|
| 본인은 본 연구의 수행에 따른 개인정보의 수집 및 이용에 동의합니다. | 예 <input type="checkbox"/> 아니오 <input type="checkbox"/> |
| 본인은 본 연구의 수행에 따른 민감정보의 수집 및 이용에 동의합니다. | 예 <input type="checkbox"/> 아니오 <input type="checkbox"/> |

7. 본인은 이 동의서 사본을 받을 것을 알고 있습니다.

|                                  |    |                                                        |
|----------------------------------|----|--------------------------------------------------------|
| 대상자 성명                           | 서명 | 날짜 (년/월/일)                                             |
| 법정대리인 성명<br>(대상자와의 관계: )         | 서명 | 날짜 (년/월/일)                                             |
| 입회인 성명<br>(해당되는 경우)              | 서명 | 날짜 (년/월/일)                                             |
| 성명<br>연구책임자 또는 연구책임자의<br>위임을 받은자 | 서명 | 날짜 (년/월/일)<br><br>* 대리인이 서명하는 경우 대리인임을 확인 할 수 있는 서류 첨부 |
